# HIV cell-to-cell spread slows evolution of drug resistance

1 Jessica Hunter<sup>1,2</sup>, Sandile Cele<sup>1,2</sup>, Laurelle Jackson<sup>1</sup>, Jennifer Giandhari<sup>3</sup>, Tulio de Oliveira<sup>3</sup>, Gila Lustig<sup>4</sup>, Alex Sigal<sup>1,2,5\*</sup>,

2 <sup>1</sup> Africa Health Research Institute, Durban 4001, South Africa.

3 <sup>2</sup> School of Laboratory Medicine and Medical Sciences, University of KwaZulu-Natal, Durban, South Africa.

4 <sup>3</sup> KwaZulu-Natal Research Innovation and Sequencing Platform, Durban 4001, South Africa.

5 <sup>4</sup> Centre for the AIDS Programme of Research in South Africa, Durban 4001, South Africa.

6 <sup>5</sup> Max Planck Institute for Infection Biology, Berlin 10117, Germany.

7 \* alex.sigal@ahri.org

## 8 Abstract

9 Many enveloped viruses such as HIV have evolved to transmit by two infection modes: cell-free infection and cell-to-cell spread.  
10 Cell-to-cell spread is highly efficient as it involves directed viral transmission from the infected to the uninfected cell. In  
11 contrast, cell-free infection relies on chance encounters between the virion and cell. Despite the higher efficiency of cell-to-cell  
12 spread, there is substantial transmission by cell-free infection in conjunction with cell-to-cell spread. A possible reason is that  
13 cell-free infection offers a selective advantage by increasing sensitivity to factors interfering with infection, hence accelerating  
14 evolution of resistance relative to cell-to-cell spread alone. Here we investigated whether a combination of cell-free infection  
15 and cell-to-cell spread confers a selective advantage in experimental evolution to an antiretroviral drug. We maintained HIV  
16 infection using coculture of infected with uninfected cells in the face of moderate inhibition by the reverse transcriptase inhibitor  
17 efavirenz. We tested the effect on the rate of drug resistance evolution of replacing one coculture infection cycle with an  
18 infection cycle involving cell-free infection only, and observed earlier evolution of drug resistance mutations to efavirenz. When  
19 we increased selective pressure by adding a second reverse transcriptase inhibitor, emtricitabine, infection with the cell-free  
20 step consistently evolved multidrug resistance to both drugs and was able to replicate. In contrast, infection without a cell-free  
21 step mostly failed to evolve multidrug resistance. Therefore, HIV cell-to-cell spread decreases the ability of HIV to rapidly  
22 evolve resistance to inhibitors, which is conferred by cell-free infection.

## 23 Author summary

24 Cell-to-cell spread of HIV differs from cell-free, diffusion-based HIV infection in that viral transmission is directed from the  
25 infected to the uninfected cell through cellular interactions. Cell-to-cell spread has been recognized as a highly efficient infection  
26 mode that is able to surmount inhibition by antibodies and antiretroviral drugs. However, the effect of HIV cell-to-cell spread  
27 on the rate of evolution of viral resistance to infection inhibitors has not been studied. Here we used experimental evolution to  
28 investigate the effect of cell-to-cell spread versus cell-free infection on the emergence of drug resistance mutations to one or  
29 a combination of antiretroviral drugs. We found that replacing one infection cycle in experimental evolution with cell-free  
30 infection, where the filtered supernatant from infected cells, but not the cellular fraction, is used as the viral source, results  
31 in more rapid evolution of resistance. The consequences are that multidrug resistance consistently evolves with a cell-free  
32 viral cycle, but not when infection is solely by coculture of infected and uninfected cells. A possible consequence is that in  
33 environments where HIV cell-to-cell spread may predominate and some residual viral replication occurs in the face of ART, the  
34 emergence of drug resistance mutations would be delayed.

## 35 Introduction

36 Despite the overall success of antiretroviral therapy (ART) at suppressing HIV replication, evolution of drug resistance remains  
37 a considerable concern as it leads to the replication of HIV in the face of ART due to acquisition of drug resistance mutations.  
38 Incomplete viral suppression of HIV because of treatment interruptions (1–7), and lowered drug levels in some anatomical  
39 compartments (8–12) contribute to the selection of drug resistance mutations (13, 14). Drug resistance mutations enable  
40 HIV to replicate in the face of what should be suppressive ART concentrations if sufficient mutations are accumulated and  
41 result in multidrug resistance (10, 15). The prevalence of drug resistance mutations in HIV infected individuals on ART is  
42 about 10% (16, 17), (see also the WHO HIV Drug Resistance Report 2019 at <https://www.who.int/hiv/pub/drugresistance/hivdr-report-2019/en/>).

44 A mechanism for drug insensitivity distinct from acquisition of drug resistance mutations is HIV cell-to-cell spread (18–22).  
45 Cell-to-cell spread involves the directed transmission of virions from one cell to another at close range, generally through a  
46 virological synapse or other structure which minimizes the distance HIV has to diffuse to reach the uninfected cell (23–30) but  
47 does not involve fusion (31). It has been shown to be an efficient mode of infection which decreases sensitivity to antiretroviral  
48 drugs (18, 19, 32, 33) and neutralizing antibodies (34–37). It also allows infection under unfavourable conditions (36). This  
49 includes infection of cells such as resting T cells and macrophages which have low numbers of CD4 entry receptors (38, 39). In

50 addition to increased efficiency, HIV cell-to-cell spread makes infection more rapid (22) and can more easily cross mucosal  
51 barriers (40).

52 Despite the advantages to the virus of infecting by cell-to-cell spread, a considerable amount of virus is not localized to  
53 cell-to-cell contacts (25) and transmits by cell-free infection (41–43). More generally, many enveloped viruses are able to infect  
54 by both cell-to-cell and cell-free modes (44). This may occur because cell-to-cell spread can be cytotoxic (33, 45) or cell-free  
55 virus is needed for transmission between individuals. Here we investigated the possibility that cell-free HIV infection, due to  
56 its increased sensitivity to inhibitors, could confer a selective advantage by reducing the time to evolution of drug resistance  
57 (8, 46, 47).

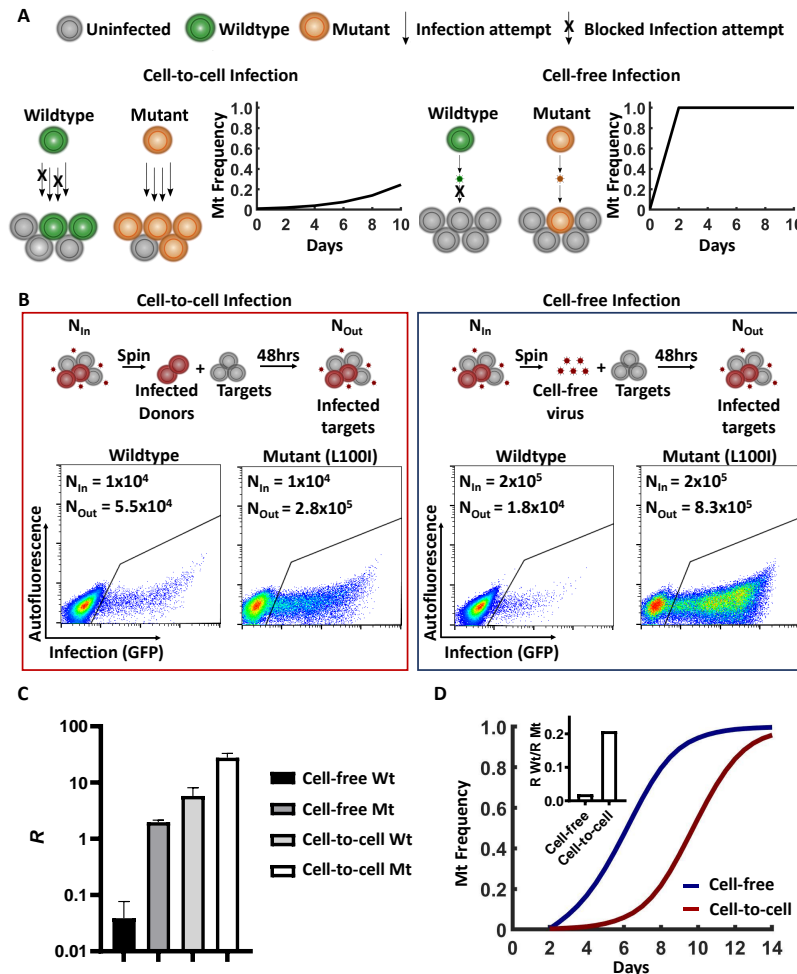

**Fig. 1.** Wild-type virus is predicted to be more rapidly supplanted by the drug resistant mutant with cell-free infection relative to cell-to-cell spread. A) Schematic. Orange cells are mutant infected, green are wild-type infected, grey uninfected. Arrows represent infection attempts, with an "x" denoting an infection attempt blocked by drug. B) Measurement of the replication ratio ( $R$ ), defined as the number of infected cells at the end of 48 hours of infection ( $N_{out}$ ) divided by input number of infected cells added directly or from which cell-free virus was harvested at infection start ( $N_{in}$ ). The cellular and cell-free fractions were derived by spinning the sample and using the infected cells from the pellet (cell-to-cell, left plot) or the filtered supernatant of the same infected cells (cell-free, right plot) for infection. Infected cells are in the GFP positive gate. Left plots shows  $N_{out}$  per mL for wild-type and mutant infection when infection was by cell-to-cell spread and  $N_{in}$  per mL was  $1 \times 10^4$ . Right plots shows  $N_{out}$  per mL for wild-type and mutant infection when infection was by cell-free virus and  $N_{in}$  per mL was  $2 \times 10^5$ . C) Measured  $R$  values for wild-type and L1001 mutant HIV for infection by cell-free and cell-to-cell. D) Expected frequency of the drug resistant mutant with (blue line) and without (red line) a single cycle of cell-free infection. Frequency was calculated as  $F_i^{mt} = N_i^{mt} / (N_i^{mt} + N_i^{wt})$ , where  $N_i^{mt}$  and  $N_i^{wt}$  are the number of mutant and wild-type infected cells respectively at infection cycle  $i$ , and where  $N_i = RN_{i-1}$ . Inset shows the ratio of wild-type to mutant  $R$  values for cell-free infection and cell-to-cell spread.

58 We performed *in vitro* evolution in the face of the antiretroviral drug efavirenz (EFV) using coculture of infected with  
59 uninfected cells. We used a concentration of EFV similar to that predicted upon treatment interruption of several days, due to the increased half-life of EFV relative to the other drug components of the ART regimen (7, 48–53). We introduced a  
60 cell-free infection cycle, where we harvested the cell-free virus by filtering out the infected cells and used it as the sole infection  
61 source for one infection cycle. The other infection cycles occurring by coculture of infected and uninfected cells which allows  
62 cell-to-cell spread (18). We observed a faster fixation of an EFV drug resistance mutant with the cell-free infection cycle  
63 relative to coculture alone. Upon transfer of infection with the cell-free step to a culture containing a two drug combination of  
64 EFV and the reverse transcriptase inhibitor emtricitabine (FTC), infection containing a cell-free infection cycle was able to  
65

66 evolve drug resistance to both drugs, while infection without the cell-free step failed to evolve multidrug resistance. Therefore,  
67 cell-free infection confers the ability to rapidly evolve to selective pressure.

## 68 Results

69 **Faster evolution of drug resistance to EFV with cell-free infection.** We reasoned that in cell-to-cell spread, which occurs when  
70 infected (donor) cells and uninfected (target) cells are cocultured, the frequency of a drug resistant mutant would rise gradually  
71 in the face of moderate drug pressure. This would be because the mutant needs to supplant the still replicating drug sensitive  
72 (wild-type) HIV genotype. In contrast, cell-free infection is more sensitive to inhibitors, and so wild-type virus would be  
73 effectively cleared even at moderate levels of drug. This would rapidly increase the frequency of the drug resistant mutant  
74 (Figure 1A).

75 To experimentally measure the effect of drug on wild-type and mutant virus in cell-free infection and cell-to-cell spread, we  
76 determined the replication ratio for both infection modes in the face of 20nM of EFV. The replication ratio with cell-to-cell  
77 spread ( $R_{cc}$ ) was derived by measuring the number of infected cells ( $N_{out}$ ) 2 days (approximately 1 viral cycle) post-infection  
78 divided by the number of input infected cells ( $N_{in}$ ). The cell-free replication ratio ( $R_{cf}$ ) was derived as for cell-to-cell spread,  
79 except that only the supernatant from  $N_{in}$  was used (Figure 1B). To determine  $R_{cf}$ , input was supernatant from  $2 \times 10^5$   
80 cells/mL infected with wild-type or the L100I EFV resistance mutant, where the L100I confers about 10-fold resistance to  
81 EFV (<https://hivdb.stanford.edu/cgi-bin/PositionPhenoSummary.cgi>). We obtained a mean  $N_{out}$  of  $1.8 \times 10^4 \pm 7.9 \times 10^3$   
82 infected cells for the cell-free infection with wild-type virus. When L100I mutant virus was used, the mean  $N_{out}$  increased  
83 to  $8.3 \times 10^5 \pm 1.8 \times 10^4$ . To measure  $R_{cc}$ , we used a lower input of  $1 \times 10^4$ /mL of cells infected with wild-type or the L100I  
84 EFV resistance mutant to prevent saturation of infection. We obtained a mean  $N_{out}$  of  $5.5 \times 10^4 \pm 1.7 \times 10^4$  for infection  
85 with wild-type and  $2.8 \times 10^5 \pm 5.4 \times 10^4$  for infection with the L100I mutant virus respectively. The mean  $R_{cf}$  was therefore  
86  $0.039 \pm 0.032$  for wild-type virus and  $2.0 \pm 0.16$  for the L100I mutant (Figure 1C). The mean  $R_{cc}$  was  $5.5 \pm 1.7$  for wild-type  
87 virus and  $28 \pm 5.4$  for the L100I mutant. Therefore, the effect of 20nM of EFV on coculture infection was moderate: wild-type  
88 infection could still replicate and expand, as  $R > 1$ . In contrast, the effect of EFV on cell-free infection of wild-type was much  
89 stronger.  $R_{cc}$  of the L100I mutant was approximately 5-fold higher compared to wild-type. In contrast, the L100I mutant  
90 increased  $R_{cf}$  approximately 50-fold.

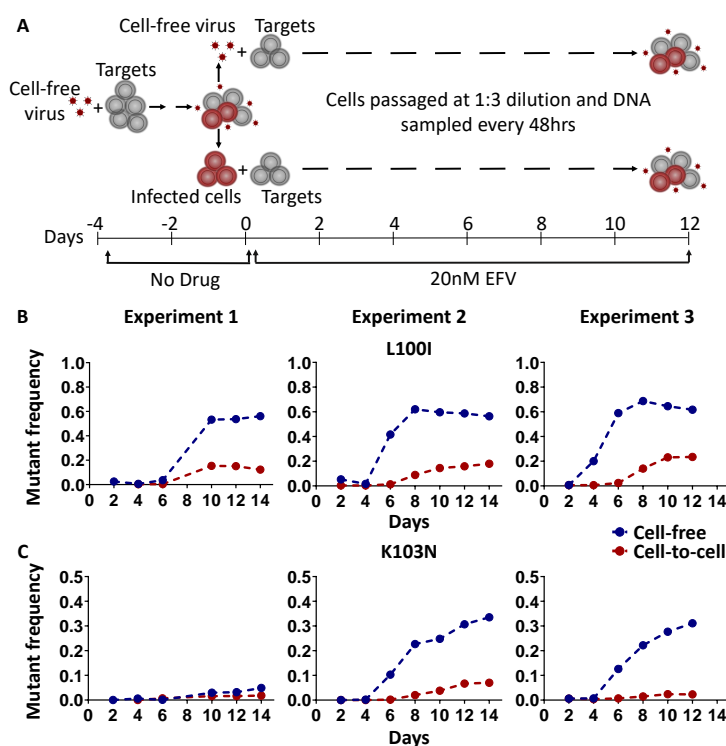

**Fig. 2.** Frequencies of L100I and K103N EFV resistance mutations rise more rapidly with a cell-free infection step. A) Schematic of the experimental procedure. Targets denote uninfected cells to which cell-free virus or infected cells are added. B) Frequencies of the L100I EFV resistance mutation with a cell-free step (blue points) and without a cell-free step (red points) in three independent experiments. C) Frequencies of the K103N EFV resistance mutation with and without a cell-free step in the same three independent experiments as (B).

91 To determine the expected effect of this difference, we calculated the expected frequency of the drug resistant mutant in the  
92 total viral pool over time (Figure 1D, Materials and Methods) starting from the measured frequency of the L100I mutant  
93 (SFig. 1). We either included or excluded one cell-free infection step at the first infection cycle. The calculation showed that

94 with an initial cell-free infection cycle, the frequency of the L100I EFV resistant mutant was substantially higher at the initial  
 95 timepoints relative to cell-to-cell spread alone. At later timepoints post-infection, the L100I mutant supplanted the wild-type  
 96 whether or not a cell-free step was included.

97 To examine whether a cell-free infection step could accelerate evolution of drug resistance, we performed *in vitro* evolution  
 98 experiments in the face of 20nM EFV by the coculture of infected with uninfected cells. Two cycles of infection were first  
 99 performed in the absence of drug to obtain a quasispecies (Materials and Methods), allowing selection from a pre-existing  
 100 pool of single drug resistant mutations which were present at a low but detectable frequency (SFig. 1). Ongoing infection was  
 101 maintained in the presence of drug by the addition of new uninfected cells every 2 days (Figure 2A). We included a cell-free  
 102 infection cycle by pelleting the infected cells and filtering the supernatant to obtain cell-free virus and infected cells from  
 103 the same infected cell population. We then infected new cells by using either the entire cellular fraction or the entire filtered  
 104 supernatant from the cellular fraction during the first infection cycle in the presence of EFV (Figure 2A). In the latter case,  
 105 infection would be exclusively by the cell-free mode. 20nM EFV monotherapy, the drug concentration used, may occur in  
 106 individuals on EFV based ART regimen after several days of treatment interruption due to the longer half-life of EFV relative  
 107 to other common ART components (7, 48–53).

108 Upon passaging of infection with 20nM EFV, we obtained evolution of the L100I drug resistance mutation (Figure 2B),  
 109 and with a delay the K103N drug resistance mutation in two out of three experiments (Figure 2C). The K103N is the more  
 110 commonly detected EFV resistance mutation in the clinical setting and confers approximately 20-fold resistance to EFV  
 111 (<https://hivdb.stanford.edu/cgi-bin/PositionPhenoSummary.cgi>).

112 In all experiments, a cell-free infection cycle led to a more rapid increase in and higher final frequencies of the L100I  
 113 mutation. By day 12 post-infection, mean mutant frequency was  $0.58 \pm 0.040$  for evolution with a cell-free infection cycle, and  
 114  $0.11 \pm 0.076$  without the cell-free infection cycle.

115 The increase in frequency of the K103N mutation was also accelerated for infection with a cell-free infection cycle in  
 116 experiments where the K103N evolved to substantial levels. Mean K103N mutant frequency at day 12 post-infection was  
 117  $0.21 \pm 0.15$  in the infection with a cell-free step, and  $0.035 \pm 0.027$  when infection was in the absence of the cell-free step.  
 118 Therefore, adding a cell-free infection cycle increased the frequencies of both drug resistance mutations in the experiments  
 119 where they evolved.

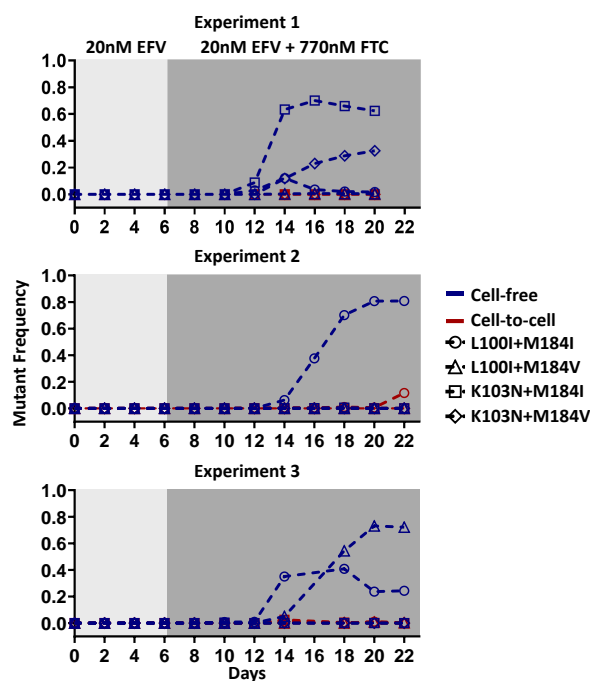

**Fig. 3.** HIV infection with a cell-free infection cycle evolves multidrug resistance. Frequencies of drug resistant mutations for infection with a cell-free infection cycle (blue) and without a cell-free infection cycle (red) for three independent evolution experiments. light grey shading indicates the days at which the infection was carried out under EFV monotherapy conditions (20nM EFV). Dark grey background shading indicates the days at which the infection was carried out in the face of the two drugs (20nM EFV and 770nM FTC).

120 **Cell-free infection but not cell-to-cell spread leads to the evolution of multidrug resistance.** To determine whether infection  
 121 with a cell-free step under EFV alone conferred a selective advantage to HIV with a combination of drugs, we added a second  
 122 drug (FTC) after a period of monotherapy with EFV. As before, the supernatant containing cell-free virus was separated and  
 123 used to establish an infection with a cell-free step in the face of EFV. The cellular fraction was used for infection without  
 124 a cell-free infection cycle in the face of EFV. Evolution was carried out at 20nM EFV for the first 3 viral cycles (6 days).  
 125 Thereafter, a drug combination of 20nM EFV and 770nM FTC was used, where the FTC concentration used similar to that

126 found in study participants on ART (48, 54, 55). Infected cells were transferred from the one drug to the two drug regimen so  
127 that in the two drug regimen infection was initiated with 1% infected cells.

128 We performed three evolution experiments where we tracked the frequency of drug resistance mutations through time  
129 (Figure 3). We observed an increase in the frequency of multidrug resistance (mutations to both EFV and FTC) in the presence  
130 of the cell-free step: The EFV resistance mutations L100I or K103N were linked to FTC mutations M184V or M184I. Both  
131 M184V and M184I confer high level resistance to FTC (<https://hivdb.stanford.edu/cgi-bin/PositionPhenoSummary.cgi>).

132 In the first experiment, the infection with a cell-free step evolved the L100I single mutant by day 6 under EFV monotherapy  
133 (SFig. 2A). This mutation was supplanted by the K103N single mutant and the L100I/M184I, K103N/M184I, and K103N/M184V  
134 multidrug resistant mutants during evolution in the face of EFV and FTC. The K103N and the L100I M184I variants were in  
135 turn out-competed, with the K103N/M184I and K103N/M184V multidrug resistant mutants dominating by day 16 (Figure  
136 3, blue squares and diamonds, respectively). In the second experiment, the infection with a cell-free step showed detectable  
137 L100I at day 6 (SFig. 2A). The L100I/M184I arose to detectable levels by day 14 and dominated infection by day 18 of the  
138 experiment (Figure 3, blue circles). In the third experiment, by day 6 the infection with a cell-free step evolved the L100I  
139 mutation to a frequency of 0.4 (SFig. 2A). This mutant was supplanted by the L100I/M184I and L100I/M184V multidrug  
140 resistance mutants in the presence of the combined regimen of EFV and FTC (Figure 3, blue circles and triangles, respectively).  
141 Infection without a cell-free step failed to evolve multidrug resistance (Figure 3). The only possible exception was the L100I  
142 M184I resistance mutant, which started to be detectable on day 22 of experiment 2 (Figure 3, red circles).

143 **Increased drug pressure leads to more rapid evolution of drug resistance in the absence of cell-free infection.** The slower  
144 evolution of drug resistant mutations without a cell-free step is consistent with the drug exerting weaker selective pressure in  
145 cell-to-cell spread compared with cell-free infection (18, 33). To test the result of increasing selective pressure, we performed  
146 the evolution experiments using a higher EFV concentration of 40nM. As previously, the cell-free and cellular fractions were  
147 separated from the same infected cell population. The infected cells were used to establish an infection without a cell-free  
148 step. After passaging the infection at 40nM EFV, there was an increase in both the rate of evolution as well as the maximal  
149 frequency of the L100I mutation (Figure 4A) and the K103N mutation (Figure 4B) when compared to 20nM EFV. Mean  
150 mutant frequency for the L100I mutant at day 8 was  $0.43 \pm 0.15$  for infection in the face of 40nM EFV, close to its maximum  
151 value in these experiments. In contrast, the L100I frequency was  $0.11 \pm 0.036$  at 20nM EFV. Similarly, the K103N mutant  
152 reached its maximum frequency by day 8 at 40nM. The mean K103N frequency at day 8 at 20nM was  $0.094 \pm 0.070$ . In contrast,  
153 the frequency was  $0.018 \pm 0.0035$  at 20nM EFV. Therefore, addition of selective pressure by increasing drug concentration  
154 results in more rapid evolution by cell-to-cell spread.

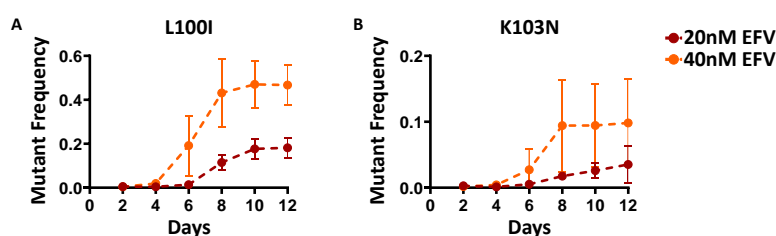

Fig. 4. Increasing drug concentration in coculture infection increases the rate of drug resistance evolution. A) L100I and B) K103N mutation frequencies for infection without a cell-free infection cycle passaged either at 20nM EFV (red) or at 40nM EFV (orange). Mean and standard deviation from 3 independent experiments.

155 **Increased drug pressure leads to a minor increase in drug resistance frequency with cell-free infection.** We asked whether  
156 the evolution of drug resistant mutations with a cell-free step would be further accelerated if drug pressure was increased.  
157 We therefore performed the experiments using 40nM EFV, as above, except that the cell-free fraction was used to establish  
158 the infection in the face of drug. Interestingly, when we compared the result to the same experiment carried out at 20nM  
159 EFV, there was a minor difference in the time to maximal frequency of the L100I mutation (Figure 5A). The L100I mutation  
160 frequency reached the near maximal mutation frequency on day 6 for 40nM EFV and day 8 for 20nM EFV. The maximal  
161 difference in frequency occurred on day 6, with mean frequency being  $0.62 \pm 0.080$  at 40nM EFV and  $0.35 \pm 0.28$  at 20nM EFV.  
162 The rate and the maximal frequency of the K103N mutation for the infection with a cell-free step was moderately increased  
163 at 40nM EFV compared to 20nM EFV. (Figure 5B). At the last timepoint tested (day 12), mean frequency for K103N was  
164  $0.41 \pm 0.20$  at 40nM EFV, compared to  $0.22 \pm 0.16$  at 20nM EFV. Therefore, while higher EFV led to an increase in the rate of  
165 selection of K103N, 20nM EFV was close to the maximal selective pressure required for rapid evolution of L100I.

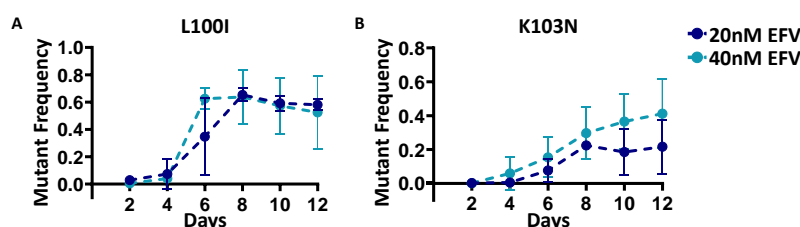

**Fig. 5.** Frequency of resistance mutations with a cell-free infection cycle under increased selective pressure. A) L100I and B) K103N mutation frequencies for infection with a cell-free step passaged either at 20nM EFV (dark blue) or at 40nM EFV (light blue). Mean and standard deviation from 3 independent experiments.

## Discussion

We demonstrated that evolution of drug resistance occurs more rapidly with a cell-free infection step. The ability to rapidly adapt to changing environmental conditions may be one explanation why HIV is transmitted between cells by cell-free infection in conjunction with cell-to-cell spread, despite the greater efficiency of the latter (19, 41, 56, 57). In the experiments, we removed all cell-to-cell spread for one infection cycle by infecting only with the cell-free virus in the filtered culture supernatant. Even though an infected cell can transmit HIV by both cell-free infection and cell-to-cell spread, cells infected at a distance from the virus producing cell, where contact between the infected and uninfected cell does not occur, may be infected by cell-free infection alone. The consequences for evolution should be captured by our experiments.

We observed that the L100I mutation was the first mutation to arise, and the rate at which it dominated the viral population was further accelerated by a cell-free infection step. The K103N mutation showed a slower increase. Yet, with both mutations, a single cycle of cell-free infection accelerated the rate at which they became predominant. Therefore, accelerated evolution of drug resistance with cell-free infection is not mutation specific. The effect of a cell-free infection cycle is similar to increasing the selective pressure in coculture infection (Figure 4). The moderate selective pressure achieved with 20nM EFV was close to the maximal level needed to select for drug resistance mutants with a cell-free infection step (Figure 5). The experimentally observed effects of a cell-free step (Figure 2) were stronger than those predicted by the higher selective pressure alone (Figure 1D). Additional processes may therefore be involved which decrease the rate at which the drug resistant mutant out-competes the wild-type in cell-to-cell spread, such as interactions between the mutant and wild-type through a process of complementation (20).

The ability to rapidly evolve drug resistance may be particularly important when evolving resistance to a regimen containing multiple antiretroviral drugs, and the primary reason current regimens contain multiple antiretroviral compounds is to prevent the evolution of drug resistance (8), as even single antiretrovirals may be sufficiently potent in suppressing HIV (58). When we introduced FTC as the second drug after EFV monotherapy, only infections with a cell-free step evolved resistance to both drugs, with the exception of one experiment, where multidrug resistance became detectable in the last timepoint of infection in the absence of a cell-free infection cycle. EFV monotherapy occurs in the clinical setting during treatment interruptions, as EFV has a longer half-life relative to FTC and the reverse transcriptase inhibitor tenofovir which are usually co-formulated with it (2, 48, 50–53). Monotherapy provides the opportunity for HIV to accumulate drug resistance mutations in a stepwise fashion (10, 15). If HIV evolves more rapidly by cell-free infection relative to cell-to-cell spread, infection by cell-free virus would allow it to quickly evolve drug resistance to the single drug during a window of monotherapy. As the other drugs are reintroduced, the replication of partially resistant virus should enable it to evolve additional drug resistance mutations. Conversely, microenvironments which favour cell-to-cell spread such as lymph nodes (59, 60) would not be expected to rapidly evolve drug resistance. If residual and compartmentalized HIV replication (12, 60, 61) does occur in some anatomical compartments, it may show a delay in drug resistance evolution. This may explain why modest non-adherence does not necessarily lead to failure of the ART regimen due to evolution of drug resistance (62–64). This is despite the expectation that, during such periods, HIV from the latent reservoir (65–72) could initiate cycles of viral replication.

By using both the cell-free and cell-to-cell infection modes, HIV is able to both rapidly evolve resistance to factors interfering with infection, and take advantage of an efficient infection mode once adaptation occurred. This makes the virus particularly suitable to survive long-term under conditions of an evolving immune response or partial drug inhibition where rapid evolution is key.

## Materials and Methods

**Inhibitors, viruses and cell lines.** The antiretrovirals EFV and FTC were obtained through the AIDS Research and Reference Reagent Program, National Institute of Allergy and Infectious Diseases, National Institutes of Health. HIV molecular clone pNL4-3 was obtained from M. Martin. Viral stocks of NL43 were produced by transfection of HEK293 cells with the molecular clone plasmid using TransIT-LT1 (Mirus) transfection reagent. Supernatant containing released virus was harvested two days post-transfection and filtered through a 0.45 micron filter (GVS). The supernatant containing virus was stored in 0.5ml aliquots at -80°C. The L100I pNL4-3 molecular clone was generated as previously described (33). RevCEM cells were obtained from Y. Wu and J. Marsh. RevCEM-E7 cells were generated as described in (22). Briefly, the E7 clone was generated by subcloning RevCEM cells at single cell density. Surviving clones were subdivided into replicate plates. One of the plates was screened for

213 the fraction of GFP expressing cells upon HIV infection using microscopy, and the clone with the highest fraction of GFP  
214 positive cells was selected. Cells were cultured in complete RPMI 1640 supplemented with L-Glutamine, sodium pyruvate,  
215 HEPES, non-essential amino acids (Lonza), and 10% heat-inactivated FBS (Hyclone).

216 **Measurement of replication ratios for cell-to-cell spread and cell-free infection.** To calculate the replication ratio for cell-free  
217 infection ( $R_{cf}$ ), the supernatant of  $2 \times 10^5$  infected RevCEM-E7 cells were used as the input to  $10^6$  cells/ml uninfected target  
218 RevCEM-E7 cells. For the calculation of the cell-to-cell replication ratio ( $R_{cc}$ ),  $1 \times 10^4$  infected donor RevCEM-E7 cells were  
219 added as the input to  $10^6$  cells/ml uninfected target cells. After 48 hours of incubation at  $37^\circ C$ , the number of output infected  
220 cells determined by flow cytometry as the number of GFP expressing cells.

221 **Calculation of mutant frequency with and without a cell-free infection step.** The calculation was performed using a Matlab  
222 2019a script where mutant frequency was calculated as:

$$F_i^{mt} = N_i^{mt} / (N_i^{mt} + N_i^{wt}).$$

223 Here  $N_i^{mt}$  and  $N_i^{wt}$  are the number of mutant and wild-type infected cells at infection cycle  $i$ , where each infection cycle is  
224 approximately 2 days.

225  $N_i^{mt}$  and  $N_i^{wt}$  are determined as:

$$N_i = RN_{i-1}.$$

226 Here  $R$  is the replication ratio of the infection for wild-type or mutant virus using the cell-free infection ( $R_{cf}$ ) or cell-to-cell  
227 spread ( $R_{cc}$ ), and  $N_{i-1}$  is the number of wild-type or mutant infected cells in the previous infection cycle.

228 If a cell-free step was included, the first infection cycle uses  $R_{cf}^{mt}$  and  $R_{cf}^{wt}$  and the number of infected cells for mutant  
229 infection is calculated as:

$$N_i^{mt} = R_{cf}^{mt} F_0^{mt} N_0.$$

230 Similarly for wild-type virus,

$$N_i^{wt} = R_{cf}^{wt} F_0^{wt} N_0.$$

231 Here  $F_0^{mt}$  is the measured initial mutant frequency, where the frequency for the L100I mutant was used ( $\mu = 5 \times 10^{-3}$ ,  $\sigma =$   
232  $5 \times 10^{-3}$ ) and  $F_0^{wt} = 1 - F_0^{mt}$ .  $N_0$  is the initial number of infected cells and can be arbitrary.

233 If a cell-free step was excluded, and for all viral cycles after  $i = 1$ , the calculation uses  $R_{cc}^{mt}$  and  $R_{cc}^{wt}$ , and the number of  
234 infected cells for mutant infection is calculated as:

$$N_i^{mt} = R_{cc}^{mt} N_{i-1}^{mt}.$$

235 Similarly for wild-type virus,

$$N_i^{wt} = R_{cc}^{wt} N_{i-1}^{wt}.$$

236 **Evolution Experiments.** Two rounds of infection were performed in the absence of drug to establish a quasispecies, followed  
237 by multiple rounds of infection in the presence of EFV or EFV and FTC. The first round of infection in the absence of drug  
238 was initiated by cell-free infection of  $2.5 \times 10^6$  RevCEM-E7 cells with  $5 \times 10^8$  viral copies of HIV NL4-3 and incubated for 48  
239 hours. In the second round of infection, cells infected in the first round were added to  $3 \times 10^6$  uninfected RevCEM-E7 cells to  
240 a final concentration of 0.5% infected cells and incubated for 48 hours. The infection was then separated into infected cells  
241 and cell-free virus by centrifugation at 300 g for 5 minutes followed by filtration of the supernatant through a 0.45 micron  
242 filter (GVS).  $1.2 \times 10^6$  infected cells or supernatant from  $1.2 \times 10^6$  infected cells were added to new uninfected target cells  
243 such that the final number of cells in the culture was  $6 \times 10^6$  at a concentration of  $1 \times 10^6$  cells/ml. EFV at a concentration of  
244 20nM or 40nM was then added to the cultures. Thereafter, cultures were maintained every 48 hours by the addition of  
245 new uninfected target cells at a 1 : 3 ratio of infected to fresh cells. In the experiments where FTC was added, FTC at the  
246 concentration of 770nM in addition to the the EFV was added 4 days after addition of 20nM EFV alone. Thereafter, cultures  
247 were maintained at a maximum of 1% infected cells by adding fresh cells every 48 hours.

248 **Sequencing for detection of drug resistant mutants.** Genomic DNA from approximately  $10^5 - 10^6$  cells was extracted from  
249 the cultures of the evolution experiments every 48 hours using *Quick*-DNA miniprep kits (Zymo Research). The HIV  
250 RT gene amplified by PCR from the proviral RNA using Phusion hot start II DNA polymerase (New England Bio-  
251 labs) PCR reaction mix. The amplicons were sequenced either by Illumina Miseq or Ion Torrent PGM. Illumina forward  
252 primer was 5'-tcgtcgccagcgtcagatgtgataagagacag TTAATAAGAGA AACTCAAGATTTTC-3' and the reverse primer  
253 5'-gtctcgtggctcggagatgtgataagagacag CAGCACTATAGGCTGTACTGTGTC-3', where lower case sequences are adaptors for  
254 Illumina sequencing. Ion Torrent forward primer was 5'-TTAATAAGAGA AACTCAAGATTTTC-3' and reverse primer was  
255 5'-CATCTGTTGAGGTGGGATTACC-3'. The PCR amplicons were visualized on a 1% agarose gel and bands of the  
256 correct size were excised an X-tracta Gel Extraction Tool (Sigma) and product extracted using the QIAquick gel extraction kit

257 (Qiagen). Input DNA for sequencing was quantified using the Qubit dsDNA HS Assay system. For Illumina sequencing, input  
258 DNA was diluted in molecular-grade water to reach the starting concentration of 0.2ng/ $\mu$ l. Barcodes were added to each sample  
259 using the Nextera XT Index kit (Illumina, Whitehead Scientific, SA ). Barcoded amplicons were purified using Ampure XP  
260 beads (Beckman Coulter, Atlanta, Georgia) and fragment analysis was performed using the LabChip GX Touch (Perkin Elmer,  
261 Waltham, US). The library was pooled at a final concentration of 4nM and further diluted to 3pM. The library was spiked with  
262 20% PhiX plasmid due to the low diversity of the amplicon library. The spiked library was run on a Miseq v2 with a Nano  
263 Reagent kit (Illumina). For Ion Torrent sequencing, input DNA was purified using AMPure XP beads (Beckman Coulter,  
264 Atlanta, Georgia). Barcoded adapters were added using Ion Plus Fragment Library Kit (Thermo Fisher Scientific) according to  
265 manufacturers instructions. Barcoded amplicons were quantified by qPCR using Ion library Quantitation Kit (Thermo Fisher  
266 Scientific) and diluted to a concentration of 100pM. Libraries were then pooled and loaded onto chips and sequenced on Ion  
267 Torrent PGM using Ion PGM Hi-Q Sequencing Kit (Thermo Fisher Scientific). Fast-q or BAM files from sequencing runs were  
268 analysed in Geneious. Drug resistant mutations were found based on a minimum variant frequency of  $10^{-3}$ .

## 269 Acknowledgments

270 This work was supported by National Institute of Allergy and Infectious Diseases, National Institutes of Health Grant  
271 1R01AI138546. JH is supported by a fellowship from the South African National Research Foundation.

## 272 References

- 273 1. Michael Rosenblum, Steven G Deeks, Mark van der Laan, and David R Bangsberg. The risk of virologic failure decreases with duration of HIV suppression, at greater than 50% adherence to  
274 antiretroviral therapy. *PLoS one*, 4(9):e7196, 2009.
- 275 2. David R Bangsberg, Andrew R Moss, and Steven G Deeks. Paradoxes of adherence and drug resistance to HIV antiretroviral therapy. *Journal of Antimicrobial Chemotherapy*, 53(5):696–699, 2004.
- 276 3. Jessica H Oyugi, Jayne Byakika-Tusiime, Kathleen Ragland, Oliver Laeyendecker, Roy Mugerwa, Cissy Kityo, Peter Mugenyi, Thomas C Quinn, and David R Bangsberg. Treatment interruptions  
277 predict resistance in HIV-positive individuals purchasing fixed-dose combination antiretroviral therapy in kampala, uganda. *AIDS*, 21(8):965–971, 2007.
- 278 4. Jean-Jacques Parienti, Moupali Das-Douglas, Veronique Massari, David Guzman, Steven G Deeks, Renaud Verdon, and David R Bangsberg. Not all missed doses are the same: sustained nrti  
279 treatment interruptions predict HIV rebound at low-to-moderate adherence levels. *PLoS one*, 3(7):e2783, 2008.
- 280 5. Jean-Jacques Parienti, Véronique Massari, Diane Descamps, Astrid Vabret, Elisabeth Bouvet, Bernard Larouze, and Renaud Verdon. Predictors of virologic failure and resistance in HIV-infected  
281 patients treated with nevirapine-or efavirenz-based antiretroviral therapy. *Clinical Infectious Diseases*, 38(9):1311–1316, 2004.
- 282 6. Nicholas Musinguzi, Rain A Mocello, Yap Boum, Peter W Hunt, Jeffrey N Martin, Jessica E Haberer, David R Bangsberg, and Mark J Siedner. Duration of viral suppression and risk of rebound  
283 viremia with first-line antiretroviral therapy in rural uganda. *AIDS and behavior*, 21(6):1735–1740, 2017.
- 284 7. B. L. Genberg, I. B. Wilson, D. R. Bangsberg, J. Arnsten, K. Goggin, R. H. Remien, J. Simoni, R. Gross, N. Reynolds, M. Rosen, and H. Liu. Patterns of antiretroviral therapy adherence and impact  
285 on HIV RNA among patients in North America. *AIDS*, 26(11):1415–1423, Jul 2012.
- 286 8. Daniel IS Rosenbloom, Alison L Hill, S Alireza Rabi, Robert F Siliciano, and Martin A Nowak. Antiretroviral dynamics determines HIV evolution and predicts therapy outcome. *Nature medicine*, 18  
287 (9):1378, 2012.
- 288 9. Thomas B Kepler and Alan S Perelson. Drug concentration heterogeneity facilitates the evolution of drug resistance. *Proceedings of the National Academy of Sciences*, 95(20):11514–11519, 1998.
- 289 10. Stefany Moreno-Gamez, Alison L Hill, Daniel IS Rosenbloom, Dmitri A Petrov, Martin A Nowak, and Pleuni S Pennings. Imperfect drug penetration leads to spatial monotherapy and rapid evolution  
290 of multidrug resistance. *Proceedings of the National Academy of Sciences*, 112(22):E2874–E2883, 2015.
- 291 11. Philip Greulich, Bartłomiej Waclaw, and Rosalind J Allen. Mutational pathway determines whether drug gradients accelerate evolution of drug-resistant cells. *Physical review letters*, 109(8):088101,  
292 2012.
- 293 12. C. V. Fletcher, K. Staskus, S. W. Wietgreffe, M. Rothenberger, C. Reilly, J. G. Chipman, G. J. Beilman, A. Khoruts, A. Thorkelson, T. E. Schmidt, J. Anderson, K. Perkey, M. Stevenson, A. S. Perelson,  
294 D. C. Douek, A. T. Haase, and T. W. Schacker. Persistent HIV-1 replication is associated with lower antiretroviral drug concentrations in lymphatic tissues. *Proc Natl Acad Sci U S A*, 111(6):2307–12,  
295 2014. ISSN 1091-6490 (Electronic) 0027-8424 (Linking). . URL <https://www.ncbi.nlm.nih.gov/pubmed/24469825>.
- 296 13. Soo-Yon Rhee, Matthew J Gonzales, Rami Kantor, Bradley J Betts, Jaideep Ravela, and Robert W Shafer. Human immunodeficiency virus reverse transcriptase and protease sequence database.  
297 *Nucleic acids research*, 31(1):298–303, 2003.
- 298 14. Annemarie M Wensing, Vincent Calvez, Francesca Ceccherini-Silberstein, Charlotte Charpentier, Huldrych F Günthard, Roger Paredes, Robert W Shafer, and Douglas D Richman. 2019 update of  
299 the drug resistance mutations in hiv-1. *Topics in antiviral medicine*, 27(3):111, 2019.
- 300 15. Alison Feder, Kristin Harper, and Pleuni S Pennings. Challenging conventional wisdom on the evolution of resistance to multi-drug hiv treatment: Lessons from data and modeling. *bioRxiv*, page  
301 807560, 2019.
- 302 16. Ravindra K Gupta, Michael R Jordan, Binta J Sultan, Andrew Hill, Daniel HJ Davis, John Gregson, Anthony W Sawyer, Raph L Hamers, Nicaise Ndembu, Deenan Pillay, et al. Global trends in  
303 antiretroviral resistance in treatment-naïve individuals with hiv after rollout of antiretroviral treatment in resource-limited settings: a global collaborative study and meta-regression analysis. *The  
304 Lancet*, 380(9849):1250–1258, 2012.
- 305 17. G Rocheleau, CJ Brumme, J Shoveller, VD Lima, and PR Harrigan. Longitudinal trends of hiv drug resistance in a large canadian cohort, 1996–2016. *Clinical Microbiology and Infection*, 24(2):  
306 185–191, 2018.
- 307 18. Alex Sigal, Jocelyn T Kim, Alejandro B Balazs, Erez Dekel, Avi Mayo, Ron Milo, and David Baltimore. Cell-to-cell spread of HIV permits ongoing replication despite antiretroviral therapy. *Nature*,  
308 477(7362):95, 2011.
- 309 19. Christopher JA Duncan, Rebecca A Russell, and Quentin J Sattentau. High multiplicity HIV-1 cell-to-cell transmission from macrophages to cd4+ t cells limits antiretroviral efficacy. *AIDS (London,  
310 England)*, 27(14):2201, 2013.
- 311 20. Laurelle Jackson, Sandile Cele, Gila Lustig, Jennifer Giandhari, Tulio de Oliveira, Richard Neher, and Alex Sigal. Complementation can maintain a quasispecies of drug sensitive and resistant HIV.  
312 *bioRxiv*, 2020.
- 313 21. Ana Moyano, Gila Lustig, Hylton E Rodel, Tibor Antal, and Alex Sigal. Interference with hiv infection of the first cell is essential for viral clearance at sub-optimal levels of drug inhibition. *PLOS  
314 Computational Biology*, 16(2):e1007482, 2020.
- 315 22. Mikael Boullé, Thorsten G Müller, Sabrina Dähling, Yashica Ganga, Laurelle Jackson, Deeqa Mahamed, Lance Oom, Gila Lustig, Richard A Neher, and Alex Sigal. HIV cell-to-cell spread results in  
316 earlier onset of viral gene expression by multiple infections per cell. *PLoS pathogens*, 12(11):e1005964, 2016.
- 317 23. Clare Jolly, Kirk Kashefi, Michael Hollinshead, and Quentin J Sattentau. HIV-1 cell to cell transfer across an env-induced, actin-dependent synapse. *Journal of Experimental Medicine*, 199(2):  
318 283–293, 2004.
- 319 24. S. Sowinski, C. Jolly, O. Berninghausen, M. A. Purbhoo, A. Chauveau, K. K?hler, S. Oddos, P. Eissmann, F. M. Brodsky, C. Hopkins, B. Onfelt, Q. Sattentau, and D. M. Davis. Membrane nanotubes  
320 physically connect T cells over long distances presenting a novel route for HIV-1 transmission. *Nat. Cell Biol.*, 10(2):211–219, Feb 2008.
- 321 25. Wolfgang Hübner, Gregory P McEnerney, Ping Chen, Benjamin M Dale, Ronald E Gordon, Frank YS Chuang, Xiao-Dong Li, David M Asmuth, Thomas Huser, and Benjamin K Chen. Quantitative 3d  
322 video microscopy of HIV transfer across t cell virological synapses. *Science*, 323(5922):1743–1747, 2009.
- 323 26. L. Wang, S. Izadmehr, E. Kamau, X. P. Kong, and B. K. Chen. Sequential trafficking of Env and Gag to HIV-1 T cell virological synapses revealed by live imaging. *Retrovirology*, 16(1):2, 01 2019.
- 324 27. Dominika Rudnicka, Jérôme Feldmann, Françoise Porrot, Steve Wietgreffe, Stéphanie Guadagnini, Marie-Christine Prévost, Jérôme Estaquier, Ashley T Haase, Nathalie Sol-Foulon, and Olivier  
325 Schwartz. Simultaneous cell-to-cell transmission of human immunodeficiency virus to multiple targets through polysynapses. *Journal of virology*, 83(12):6234–6246, 2009.
- 326 28. Nathan M Sherer, Maik J Lehmann, Luisa F Jimenez-Soto, Christina Horensavitz, Marc Pypaert, and Walther Mothes. Retroviruses can establish filopodial bridges for efficient cell-to-cell transmission.  
327 *Nature cell biology*, 9(3):310, 2007.
- 328 29. Benjamin M Dale, Raymond A Alvarez, and Benjamin K Chen. Mechanisms of enhanced hiv spread through t-cell virological synapses. *Immunological reviews*, 251(1):113–124, 2013.
- 329 30. Alex Sigal and David Baltimore. As good as it gets? the problem of HIV persistence despite antiretroviral drugs. *Cell host & microbe*, 12(2):132–138, 2012.
- 330 31. Blandine Monel, Elodie Beaumont, Daniela Vendrame, Olivier Schwartz, Denys Brand, and Fabrizio Mammano. Hiv cell-to-cell transmission requires the production of infectious virus particles and  
331 does not proceed through env-mediated fusion pores. *Journal of virology*, 86(7):3924–3933, 2012.



- 332 32. Luis M Agosto, Pradeep D Uchil, and Walther Mothes. HIV cell-to-cell transmission: effects on pathogenesis and antiretroviral therapy. *Trends in microbiology*, 23(5):289–295, 2015.
- 333 33. Laurelle Jackson, Jessica Hunter, Sandile Cele, Isabella Markham Ferreira, Andrew C Young, Farina Karim, Rajhmun Madansein, Kaylesh J Dullabh, Chih-Yuan Chen, Noel J Buckels, Yashica
- 334 Ganga, Khadija Khan, Mikael Boule, Gila Lustig, Richard A Neher, and Alex Sigal. Incomplete inhibition of HIV infection results in more HIV infected lymph node cells by reducing cell death. *eLife*,
- 335 7:e30134, 2018.
- 336 34. Irene A Abela, Livia Berlinger, Merle Schanz, Lucy Reynell, Huldrych F Günthard, Peter Rusert, and Alexandra Trkola. Cell-cell transmission enables HIV-1 to evade inhibition by potent cd4bs
- 337 directed antibodies. *PLoS pathogens*, 8(4):e1002634, 2012.
- 338 35. Christopher JA Duncan, James P Williams, Torben Schiffner, Kathleen Gärtner, Christina Ochsenbauer, John Kappes, Rebecca A Russell, John Frater, and Quentin J Sattentau. High-multiplicity
- 339 HIV-1 infection and neutralizing antibody evasion mediated by the macrophage-t cell virological synapse. *Journal of virology*, 88(4):2025–2034, 2014.
- 340 36. Peng Zhong, Luis M Agosto, Anna Ilnskaya, Batsukh Dorjbal, Rosaline Truong, David Derse, Pradeep D Uchil, Gisela Heidecker, and Walther Mothes. Cell-to-cell transmission can overcome
- 341 multiple donor and target cell barriers imposed on cell-free HIV. *PLoS one*, 8(1):e53138, 2013.
- 342 37. Torben Schiffner, Quentin J Sattentau, and Christopher JA Duncan. Cell-to-cell spread of hiv-1 and evasion of neutralizing antibodies. *Vaccine*, 31(49):5789–5797, 2013.
- 343 38. Luis M Agosto, Melissa B Herring, Walther Mothes, and Andrew J Henderson. HIV-1-infected cd4+ t cells facilitate latent infection of resting cd4+ t cells through cell-cell contact. *Cell reports*, 24(8):
- 344 2088–2100, 2018.
- 345 39. Amy E Baxter, Rebecca A Russell, Christopher JA Duncan, Michael D Moore, Christian B Willberg, Jose L Pablos, Andrés Finzi, Daniel E Kaufmann, Christina Ochsenbauer, John C Kappes, Fedde
- 346 Groot, and Quentin J. Sattentau. Macrophage infection via selective capture of HIV-1-infected cd4+ t cells. *Cell host & microbe*, 16(6):711–721, 2014.
- 347 40. Dror Kolodkin-Gal, Sandrine L Hulot, Birgit Koriath-Schmitz, Randi B Gombos, Yi Zheng, Joshua Owuor, Michelle A Lifton, Christian Ayeni, Robert M Najarian, Wendy W Yeh, et al. Efficiency of
- 348 cell-free and cell-associated virus in mucosal transmission of human immunodeficiency virus type 1 and simian immunodeficiency virus. *Journal of virology*, 87(24):13589–13597, 2013.
- 349 41. Marion Sourisseau, Nathalie Sol-Foulon, Françoise Porrot, Fabien Blanchet, and Olivier Schwartz. Inefficient human immunodeficiency virus replication in mobile lymphocytes. *Journal of virology*,
- 350 81(2):1000–1012, 2007.
- 351 42. Natalia L Komarova, Daniela Anghelina, Igor Voznesensky, Benjamin Trinité, David N Levy, and Dominik Wodarz. Relative contribution of free-virus and synaptic transmission to the spread of HIV-1
- 352 through target cell populations. *Biology letters*, 9(1):20121049, 2013.
- 353 43. Shingo Iwami, Junko S Takeuchi, Shinji Nakaoka, Fabrizio Mammano, François Clavel, Hisashi Inaba, Tomoko Kobayashi, Naoko Misawa, Kazuyuki Aihara, Yoshio Koyanagi, et al. Cell-to-cell
- 354 infection by hiv contributes over half of virus infection. *Elife*, 4:e08150, 2015.
- 355 44. Q. Sattentau. Avoiding the void: cell-to-cell spread of human viruses. *Nat Rev Microbiol*, 6(11):815–26, 2008. ISSN 1740-1534 (Electronic) 1740-1526 (Linking). . URL <https://www.ncbi.nlm.nih.gov/pubmed/18923409>.
- 356 45. Nicole LK Galloway, Gilad Doitsh, Kathryn M Monroe, Zhiyuan Yang, Isa Muñoz-Arias, David N Levy, and Warner C Greene. Cell-to-cell transmission of hiv-1 is required to trigger pyroptotic death
- 357 of lymphoid-tissue-derived cd4 t cells. *Cell reports*, 12(10):1555–1563, 2015.
- 358 46. Martin Nowak and Robert M May. *Virus dynamics: mathematical principles of immunology and virology: mathematical principles of immunology and virology*. Oxford University Press, UK, 2000.
- 359 47. Libin Rong, Michael A Gilchrist, Zhilan Feng, and Alan S Perelson. Modeling within-host hiv-1 dynamics and the evolution of drug resistance: trade-offs between viral enzyme function and drug
- 360 susceptibility. *Journal of Theoretical Biology*, 247(4):804–818, 2007.
- 361 48. Gila Lustig, Sandile Cele, Farina Karim, Yashica Ganga, Khadija Khan, Bernadett Gosnell, Yunus Moosa, Rohen Harrichandparsad, Suzaan Marais, Ravindra K Gupta, Derache Anne, Jennifer
- 362 Giandhari, Tulio de Oliveira, Katya Govender, John Adamson, Vinod Patel, and Alex Sigal. The cns in the face of art contains t cell origin HIV which can lead to drug resistance. *bioRxiv*,
- 363 <https://doi.org/10.1101/588426>, 2019.
- 364 49. Peter L Anderson, Jennifer J Kiser, Edward M Gardner, Joseph E Rower, Amie Meditz, and Robert M Grant. Pharmacological considerations for tenofovir and emtricitabine to prevent HIV infection.
- 365 *Journal of Antimicrobial Chemotherapy*, 66(2):240–250, 2010.
- 366 50. Saskia ME Vrouenraets, Ferdinand WNM Wit, Jacqueline van Tongeren, and Joep MA Lange. Efavirenz: a review. *Expert opinion on pharmacotherapy*, 8(6):851–871, 2007.
- 367 51. Stephen Taylor, Marta Boffito, Saye Khoo, Erasmus Smit, and David Back. Stopping antiretroviral therapy. *Aids*, 21(13):1673–1682, 2007.
- 368 52. H. J. Ribaudo, D. W. Haas, C. Tierney, R. B. Kim, G. R. Wilkinson, R. M. Gulick, D. B. Clifford, C. Marzolini, C. V. Fletcher, K. T. Tashima, D. R. Kuritzkes, and E. P. Acosta. Pharmacogenetics of
- 369 plasma efavirenz exposure after treatment discontinuation: an Adult AIDS Clinical Trials Group Study. *Clin. Infect. Dis.*, 42(3):401–407, Feb 2006.
- 370 53. Jonathan Shuter. Forgiveness of non-adherence to HIV-1 antiretroviral therapy. *Journal of Antimicrobial Chemotherapy*, 61(4):769–773, 2008.
- 371 54. B. M. Best, P. P. Koopmans, S. L. Letendre, E. V. Capparelli, S. S. Rossi, D. B. Clifford, G. C. Collier, B. B. Gelman, G. Mbeo, J. A. McCutchan, D. M. Simpson, R. Haubrich, R. Ellis, and I. Grant.
- 372 Efavirenz concentrations in csf exceed ic50 for wild-type HIV. *J Antimicrob Chemother*, 66(2):354–7, 2011. ISSN 1460-2091 (Electronic) 0305-7453 (Linking). . URL <http://www.ncbi.nlm.nih.gov/pubmed/21098541>.
- 373 55. B Best, S Letendre, E Capparelli, R Ellis, S Rossi, P Koopmans, and I Grant. Efavirenz and emtricitabine concentrations consistently exceed wild-type ic50 in cerebrospinal fluid: Charter findings.
- 374 In *16th Conference on Retroviruses and Opportunistic Infections*, 2009.
- 375 56. Ping Chen, Wolfgang Hübner, Matthew A Spinelli, and Benjamin K Chen. Predominant mode of human immunodeficiency virus transfer between t cells is mediated by sustained env-dependent
- 376 neutralization-resistant virological synapses. *Journal of virology*, 81(22):12582–12595, 2007.
- 377 57. DS Dimitrov, RL Willey, H Sato, L-Ji Chang, R Blumenthal, and MA Martin. Quantitation of human immunodeficiency virus type 1 infection kinetics. *Journal of virology*, 67(4):2182–2190, 1993.
- 378 58. Lin Shen, Susan Peterson, Ahmad R Sedaghat, Moira A McMahon, Marc Callender, Haiji Zhang, Yan Zhou, Eleanor Pitt, Karen S Anderson, Edward P Acosta, et al. Dose-response curve slope
- 379 sets class-specific limits on inhibitory potential of anti-HIV drugs. *Nature medicine*, 14(7):762, 2008.
- 380 59. Thomas T Murooka, Maud Deruaz, Francesco Marangoni, Vladimir D Vrbancak, Edward Seung, Ulrich H Von Andrian, Andrew M Tager, Andrew D Luster, and Thorsten R Mempel. Hiv-infected t
- 381 cells are migratory vehicles for viral dissemination. *Nature*, 490(7419):283–287, 2012.
- 382 60. Kenneth M Law, Natalia L Komarova, Alice W Yewdall, Rebecca K Lee, Olga L Herrera, Dominik Wodarz, and Benjamin K Chen. In vivo HIV-1 cell-to-cell transmission promotes multicopy
- 383 micro-compartmentalized infection. *Cell reports*, 15(12):2771–2783, 2016. ISSN 2211-1247.
- 384 61. R. Lorenzo-Redondo, H. R. Fryer, T. Bedford, E. Y. Kim, J. Archer, S. L. Kosakovsky Pond, Y. S. Chung, S. Penugonda, J. G. Chipman, C. V. Fletcher, T. W. Schacker, M. H. Malim, A. Rambaut,
- 385 A. T. Haase, A. R. McLean, and S. M. Wolinsky. Persistent HIV-1 replication maintains the tissue reservoir during therapy. *Nature*, 530(7588):51–6, 2016. ISSN 1476-4687 (Electronic) 0028-0836
- 386 (Linking). URL <http://www.ncbi.nlm.nih.gov/pubmed/26814962>.
- 387 62. Alexander O Pasternak, Marijn de Bruin, Suzanne Jurriaans, Margreet Bakker, Ben Berkhout, Jan M Prins, and Vladimir V Lukashov. Modest nonadherence to antiretroviral therapy promotes
- 388 residual hiv-1 replication in the absence of virological rebound in plasma. *The Journal of infectious diseases*, 206(9):1443–1452, 2012.
- 389 63. Jose R Castillo-Mancilla, Todd T Brown, Kristine M Erlandson, Frank J Palella Jr, Edward M Gardner, Bernard JC Macatangay, Elizabeth C Breen, Lisa P Jacobson, Peter L Anderson, and Nikolas I
- 390 Wada. Suboptimal adherence to combination antiretroviral therapy is associated with higher levels of inflammation despite hiv suppression. *Clinical Infectious Diseases*, page ciw650, 2016.
- 391 64. David R Bangsberg. Less than 95% adherence to nonnucleoside reverse-transcriptase inhibitor therapy can lead to viral suppression. *Clinical infectious diseases*, 43(7):939–941, 2006.
- 392 65. N. Chomont, M. El-Far, P. Ancuta, L. Trautmann, F. A. Procopio, B. Yassine-Diab, G. Boucher, M. R. Boulassel, G. Ghattas, J. M. Brenchley, T. W. Schacker, B. J. Hill, D. C. Douek, J. P. Routy, E. K.
- 393 Haddad, and R. P. Sekaly. HIV reservoir size and persistence are driven by t cell survival and homeostatic proliferation. *Nat Med*, 15(8):893–900, 2009. ISSN 1546-170X (Electronic) 1078-8956
- 394 (Linking). URL <http://www.ncbi.nlm.nih.gov/pubmed/19543283>.
- 395 66. Tae-Wook Chun, Lieven Stuyver, Stephanie B Mizell, Linda A Ehler, Jo Ann M Mican, Michael Baseler, Alun L Lloyd, Martin A Nowak, and Anthony S Fauci. Presence of an inducible HIV-1 latent
- 396 reservoir during highly active antiretroviral therapy. *Proceedings of the National Academy of Sciences*, 94(24):13193–13197, 1997.
- 397 67. Diana Finzi, Joel Blankson, Janet D Siliciano, Joseph B Margolick, Karen Chadwick, Theodore Pierson, Kendall Smith, Julianna Lisiewicz, Franco Lori, Charles Flexner, T C Quinn, R E Chaisson,
- 398 E Rosenberg, B Walker, S Gange, J Gallant, and R F Siliciano. Latent infection of cd4+ t cells provides a mechanism for lifelong persistence of HIV-1, even in patients on effective combination
- 399 therapy. *Nature medicine*, 5(5):512, 1999.
- 400 68. Susanne Eriksson, Erin H Graf, Viktor Dahl, Matthew C Strain, Steven A Yuki, Elena S Lysenko, Ronald J Bosch, Jun Lai, Stanley Chioma, Fatemeh Emad, Mohamed Abdel-Mohsen, Rebecca
- 401 Hoh, Frederick Hecht, Peter Hunt, Ma Somsouk, Joseph Wong, Rowena Johnston, Robert F Siliciano, Douglas D Richman, Una O'Doherty, Sarah Palmer, Steven G Deeks, and Janet D Siliciano.
- 402 Comparative analysis of measures of viral reservoirs in HIV-1 eradication studies. *PLoS pathogens*, 9(2):e1003174, 2013.
- 403 69. K. M. Bruner, Z. Wang, F. R. Simonetti, A. M. Bender, K. J. Kwon, S. Sengupta, E. J. Fray, S. A. Beg, A. A. R. Antar, K. M. Jenike, L. N. Bertagnoli, A. A. Capoferri, J. T. Kufera, A. Timmons,
- 404 C. Nobles, J. Gregg, N. Wada, Y. C. Ho, H. Zhang, J. B. Margolick, J. N. Blankson, S. G. Deeks, F. D. Bushman, J. D. Siliciano, G. M. Laird, and R. F. Siliciano. A quantitative approach for measuring
- 405 the reservoir of latent HIV-1 proviruses. *Nature*, 566(7742):120, 2019.
- 406 70. Janet D Siliciano, Joleen Kajdas, Diana Finzi, Thomas C Quinn, Karen Chadwick, Joseph B Margolick, Colin Kovacs, Stephen J Gange, and Robert F Siliciano. Long-term follow-up studies confirm
- 407 the stability of the latent reservoir for HIV-1 in resting cd4+ t cells. *Nature medicine*, 9(6):727, 2003.
- 408 71. Melissa J Churchill, Steven G Deeks, David M Margolis, Robert F Siliciano, and Ronald Swanstrom. HIV reservoirs: what, where and how to target them. *Nature Reviews Microbiology*, 14(1):55,
- 409 2016.
- 410 72. Steven G Deeks, Brigitte Autran, Ben Berkhout, Monsef Benkirane, Scott Cairns, Nicolas Chomont, Tae-Wook Chun, Melissa Churchill, Michele Di Mascio, and Christine Katlama. Towards an HIV
- 411 cure: a global scientific strategy. *Nature reviews Immunology*, 12(8):607, 2012. ISSN 1474-1741.
- 412
- 413

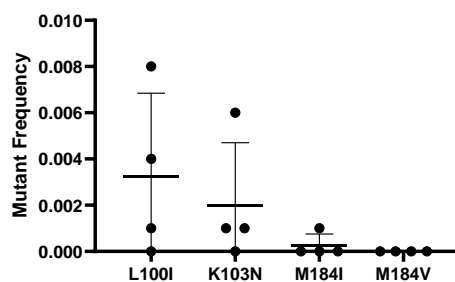

**SFig. 1.** Mutant frequencies measured at start of evolution experiments after two cycles of infection in the absence of drug. The mean frequency for L100I, K103N and M184I were  $3 \times 10^{-2} \pm 4 \times 10^{-2}$ ,  $2 \times 10^{-2} \pm 3 \times 10^{-2}$ ,  $2 \times 10^{-3} \pm 5 \times 10^{-3}$  respectively. The mutation frequency for M184V was below the detection threshold of  $10^{-3}$ .

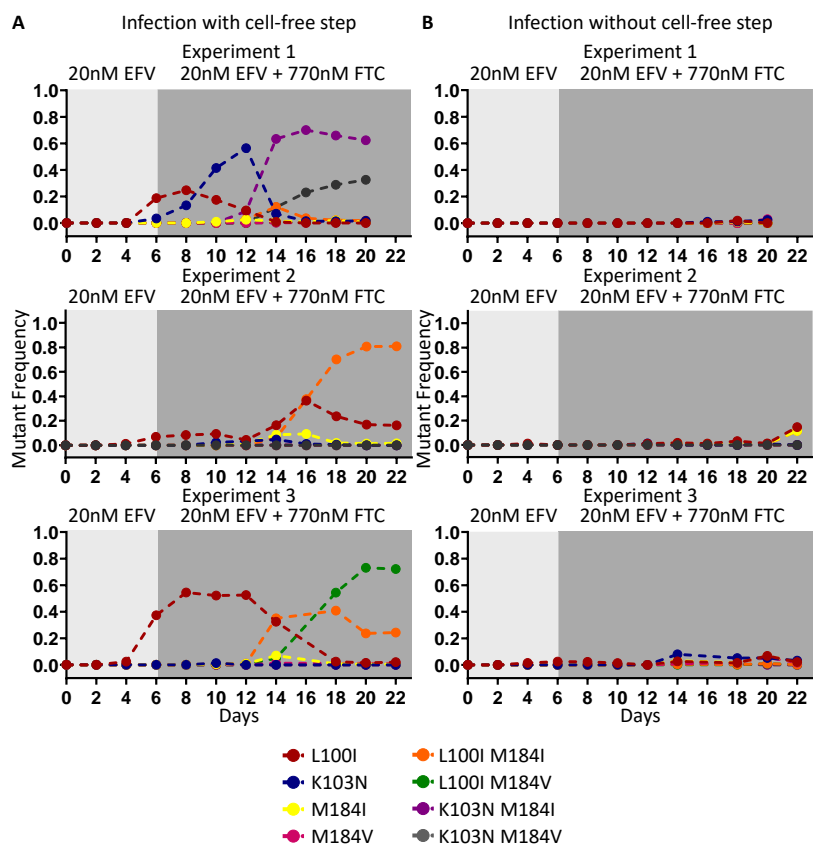

**SFig. 2.** Frequencies of single and linked multidrug resistant mutations. A) Infection in the presence of a cell-free step and B) absence of a cell-free step for 3 experiments. Light grey background shading indicates the days at which the infection was carried out under 20nM EFV monotherapy. Dark grey background shading indicates the days at which the infection in the face of 20nM EFV and 770nM FTC).
